# Supplementary material
Source: PubMed Central journal article supplement (PMC1482598)
Supplement: pnas_0602473103_7.pdf [file pnas_0602473103_7.pdf]

# Proposed Phases of healing and mechanisms / processes

## Post-wounding

a) Basal

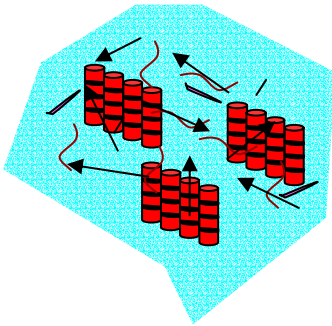

b) Early  
(0-1 Day)

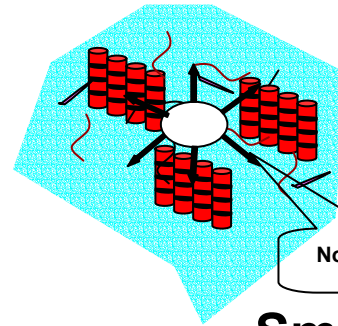

c)

Intermediate Contractile Phase  
(5-7 Days)

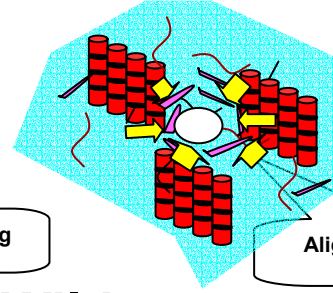

d)

Late Remodeling Phase  
(21-36 Days)

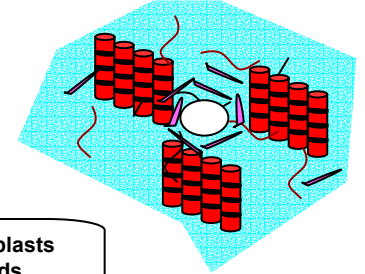

Normal Gapping wounds

Aligned Myofibroblasts contract wounds

Smad 3 Wild type

e)

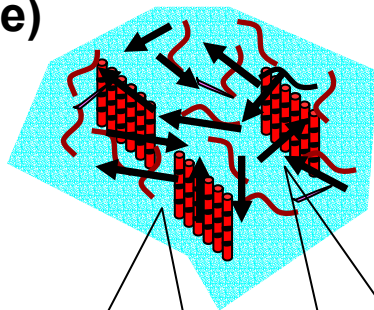

Increased  
• Elastin  
• GAGs  
• Compactly organized Collagen

f)

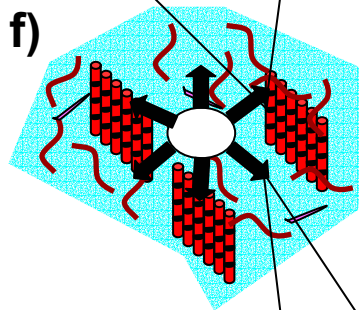

Increased Modulus  
(Toe and Linear)

g)

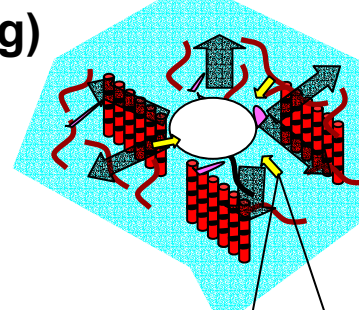

Decreased Wound Contraction

h)

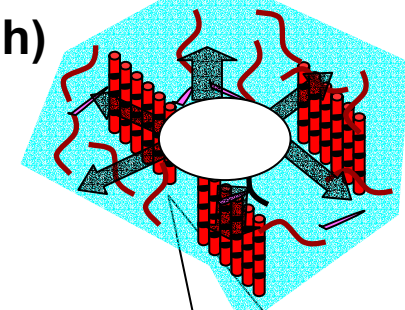

Increased matrix remodeling by MMPs

Smad 3 Knockout

Altered Integrin Expression and Mechanotransduction

# i) Time line of post-wounding changes

|                        | Ear Punch Wound                                               |                                                                                                                                                                                                                                                                                              | <u>Post-Wounding</u>                                                                                                                                              |                                                                                                                   |
|------------------------|---------------------------------------------------------------|----------------------------------------------------------------------------------------------------------------------------------------------------------------------------------------------------------------------------------------------------------------------------------------------|-------------------------------------------------------------------------------------------------------------------------------------------------------------------|-------------------------------------------------------------------------------------------------------------------|
|                        |                                                               |                                                                                                                                                                                                             | →                                                                                                                                                                 |                                                                                                                   |
|                        | <u>Basal</u>                                                  | <u>Early</u><br><u>(12-24hours)</u>                                                                                                                                                                                                                                                          | <u>Intermediate</u><br><u>(3-7 days)</u>                                                                                                                          | <u>Late</u><br><u>(21-36 days)</u>                                                                                |
| <u>Smad3 Wild Type</u> | Normal ECM composition and Mechanical Properties              | Normal Gaping forces                                                                                                                                                                                                                                                                         | Normal wound contraction (Myofibroblast transformation)                                                                                                           | Normal Matrix Remodeling and tissue forces                                                                        |
| <u>Smad3 Knockout</u>  | Perturbed ECM composition and Increased modulus of Elasticity | Increased Apoptosis<br>Decreased TGFβ1<br>Decreased MMP 9<br>Increased tissue forces<br>Increased pSrc (Tyr416),<br>Increased pFAK(Tyr397)<br>Increased pPaxillin(Tyr118),<br>Increased F-Actin assembly<br>Altered mechanotransduction<br>Increased αVβ3Integrin<br>Decreased αVβ5 Integrin | Decreased wound contraction<br>Decreased αSMA<br>Altered mechanotransduction<br>Decreased αVβ3Integrin<br>Increased αVβ5 Integrin<br>pFAK (Tyr397) not detectable | Increased remodeling<br>Increase MMP9<br>Increase MMP12<br>Increased Retractive forces<br>Increased pFAK (Tyr397) |
