# Supplementary material
Source: PubMed Central journal article supplement (PMC1482598)
Supplement: pnas_0602473103_8.pdf [file pnas_0602473103_8.pdf]

**Table 1: Antibodies**

| Molecule                  | Company                | Species | Dilution                                    | Applications | Technical Specifications                                                                                 |
|---------------------------|------------------------|---------|---------------------------------------------|--------------|----------------------------------------------------------------------------------------------------------|
| Elastin                   | Elastin products Co.   | Rabbit  | 1 : 250                                     | WB, IHC      | 1% BSA, 4°C O/N ; <b>Unmasking</b> – Guanidine HCl (6M), Dithiothreitol (50mM) and Iodoacetamide (100mM) |
| Elastin                   | Santa Cruz             | Goat    | 1 : 100                                     | IHC          | <b>Unmasking</b> – Citrate buffer and microwave                                                          |
| Smad3                     | Zymed                  | Rabbit  | 1:1000                                      | WB           | 1% BSA, 4°C O/N                                                                                          |
| βActin                    | Chemicon               | Mouse   | 1 : 30,000                                  | WB           | 1% Milk, Room Temp 15min                                                                                 |
| α Smooth Muscle Actin     | NeoMarkers             | Mouse   | 1:1000, 1 : 250 (tissues) and 1:100 (cells) | WB, IHC      | 1% BSA, 4°C O/N; <b>Unmasking</b> – Tissues: None, MOM kit (Vector Labs) Cells: Acetone 5min             |
| TGFβ1                     | CC 1-30-1 *            | Rabbit  | (1 µg/ml)                                   | IHC          | <b>Unmasking</b> – Hyaluronidase (1mg/ml) 30min                                                          |
| Phospho- FAK (Tyr397)     | BD Transduction        | Mouse   | 1 : 500                                     | WB           | 1% BSA, 4°C O/N                                                                                          |
| Total FAK                 | BD Transduction        | Mouse   | 1 : 500                                     | WB           | 1% BSA, 4°C O/N                                                                                          |
| Phospho-Paxillin (Tyr118) | Cell Signaling         | Rabbit  | 1 : 1000                                    | WB           | 1% BSA, 4°C O/N                                                                                          |
| Phospho-Src (Tyr416)      | Cell Signaling         | Rabbit  | 1 : 1000                                    | WB           | 1% BSA, 4°C O/N                                                                                          |
| Total-Src (Tyr416)        | Cell Signaling         | Rabbit  | 1 : 1000                                    | WB           | 1% BSA, 4°C O/N                                                                                          |
| Integrin αVβ3             | Chemicon               | Rabbit  | 1µg/200ug lysate                            | IP           | Protein Sepharose G                                                                                      |
| Integrin αVβ5             | Chemicon               | Rabbit  | 1µg/200ug lysate                            | IP           | Protein Sepharose G                                                                                      |
| Integrin αV               | Chemicon               | Mouse   | 1:2000                                      | WB           | 1% BSA, 4°C O/N                                                                                          |
| Phalloidin                | Molecular Probes       | FITC    | 1:20                                        | IF           | <b>Blocking:</b> BSA (1%) & Glycine (50mM)                                                               |
| Neutrophil                | Serotec                | Rat     | 1:2000                                      | IHC          | <b>Unmasking</b> – Citrate buffer and microwave                                                          |
| F4 / 80                   | Serotec                | Rat     | 1:250                                       | IHC          | <b>Unmasking</b> – Citrate buffer and microwave                                                          |
| Collagen I                | Southern Biotechnology | Goat    | 1:100                                       | IHC          | <b>Unmasking</b> – Acetone 5min                                                                          |

\* Flanders, K.C., Thompson, N.L., Cissel, D.S., Ellingsworth, L.R., Sporn, M.B., and Roberts, A.B.: Epitope-dependent immunohistochemical localization of transforming growth factor-beta. *J. Cell Biol.* 108: 653-660, 1989.

Horse-radish peroxidase substrates: **DAB** = diaminobenzidine  
(Vector labs) **VIP** = Very Intense Purple.
