# Supplementary material
Source: PubMed Central journal article supplement (PMC1482598)

**a**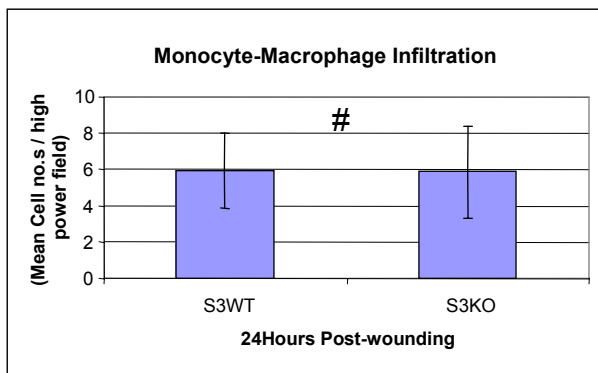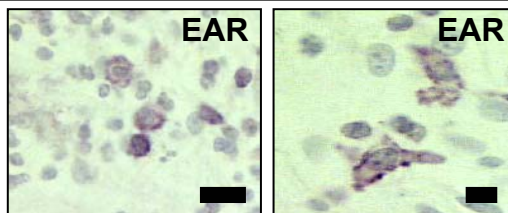**b**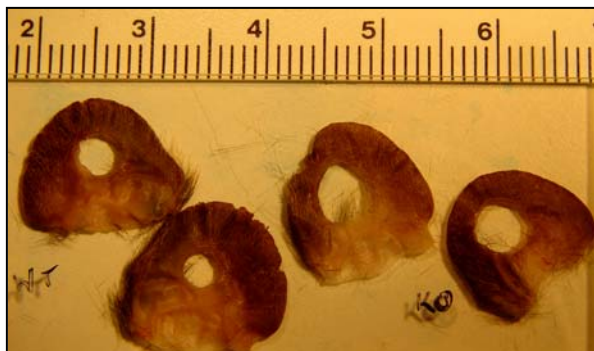

|                                |                 |                 |
|--------------------------------|-----------------|-----------------|
| <b>RECIPIENT</b>               | <b>Smad3 Wt</b> | <b>Smad3 KO</b> |
| <b>DONOR<br/>(Bone Marrow)</b> | <b>Smad3 KO</b> | <b>Smad3 WT</b> |

Supplement: pnas_0602473103_1.pdf [file pnas_0602473103_1.pdf]

S3WT

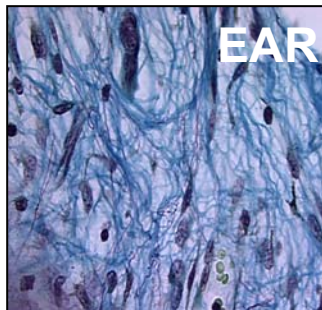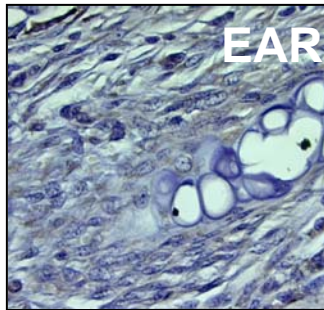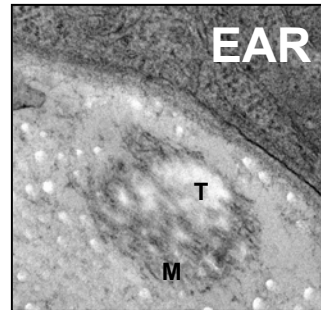

S3KO

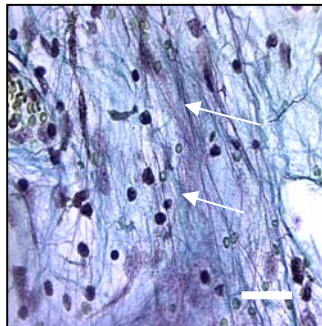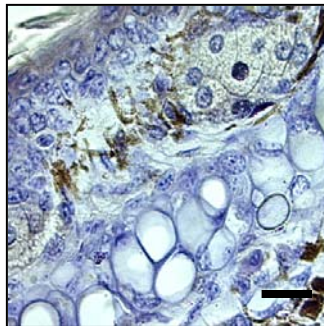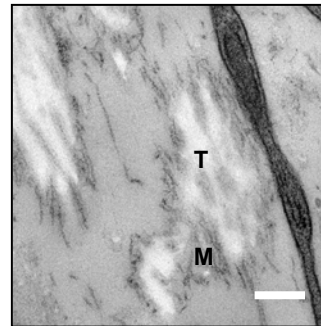

Orcein  
Picroindigocaramine

Immunostaining

EM

Supplement: pnas_0602473103_2.pdf [file pnas_0602473103_2.pdf]

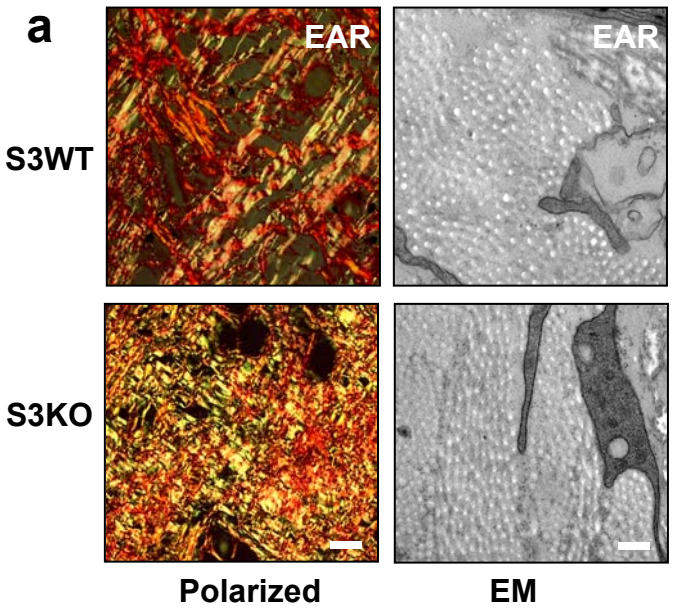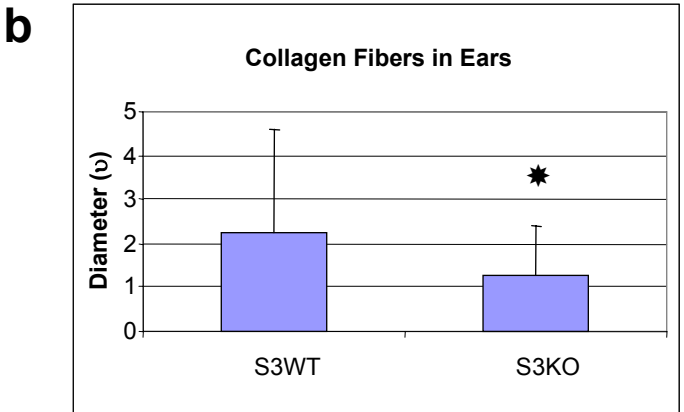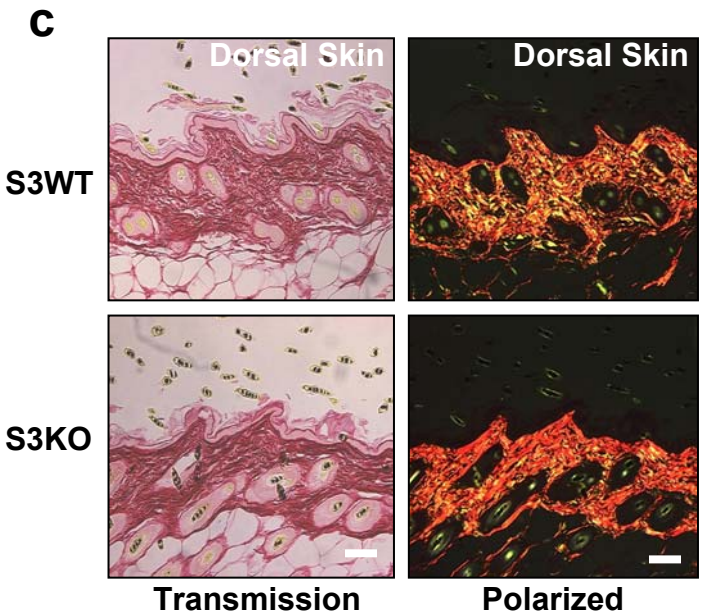

Supplement: pnas_0602473103_3.pdf [file pnas_0602473103_3.pdf]

**a**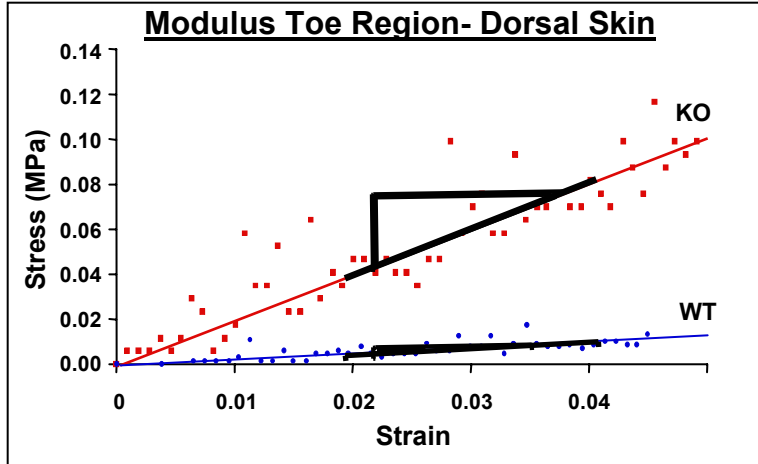**b**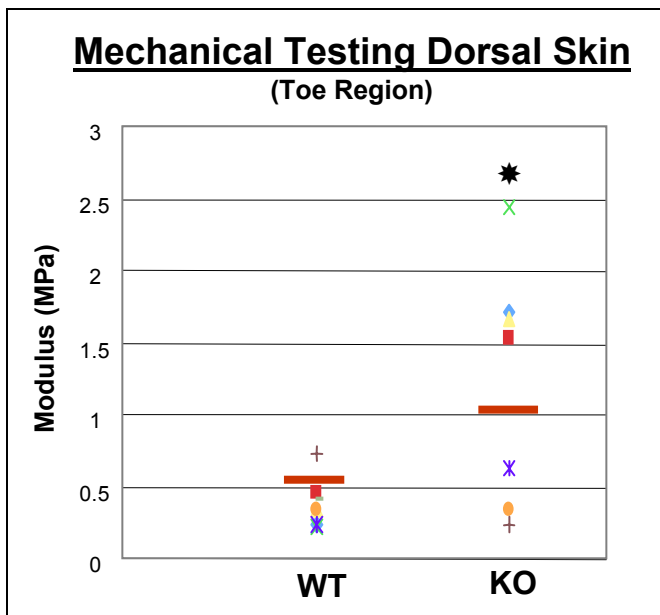

Supplement: pnas_0602473103_4.pdf [file pnas_0602473103_4.pdf]

**a****F-Actin**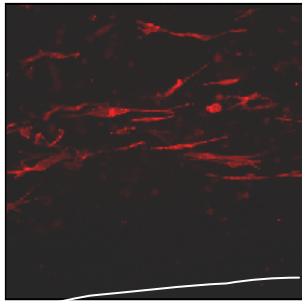**S3WT**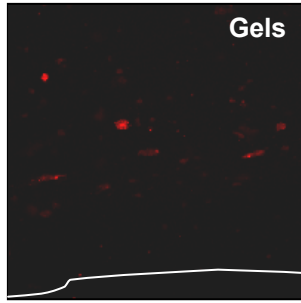**S3KO**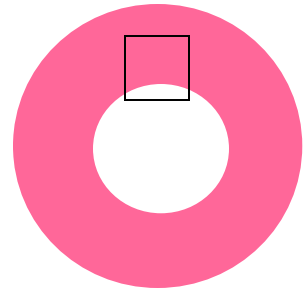

Gel Edge

**b**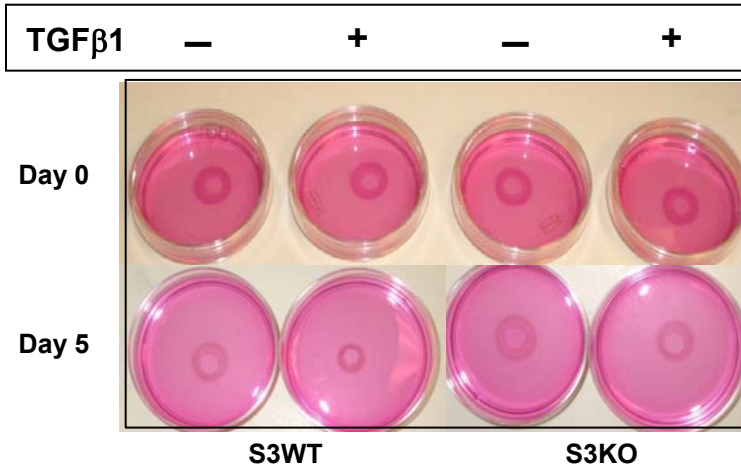**c**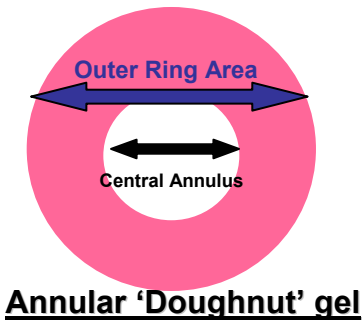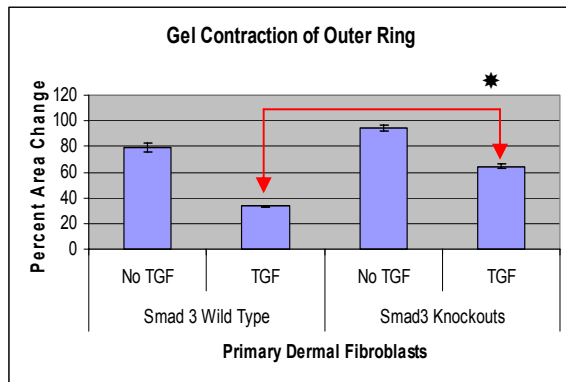

Supplement: pnas_0602473103_5.pdf [file pnas_0602473103_5.pdf]

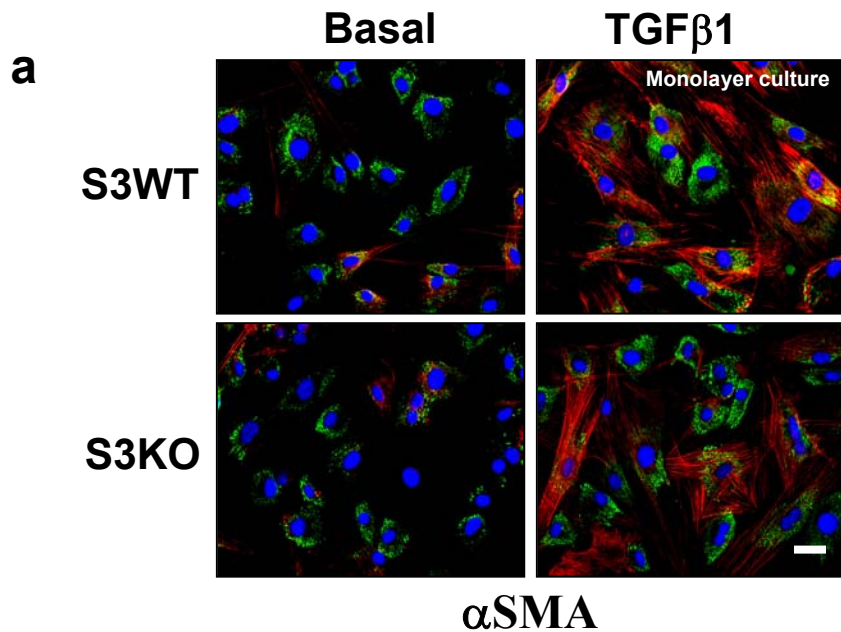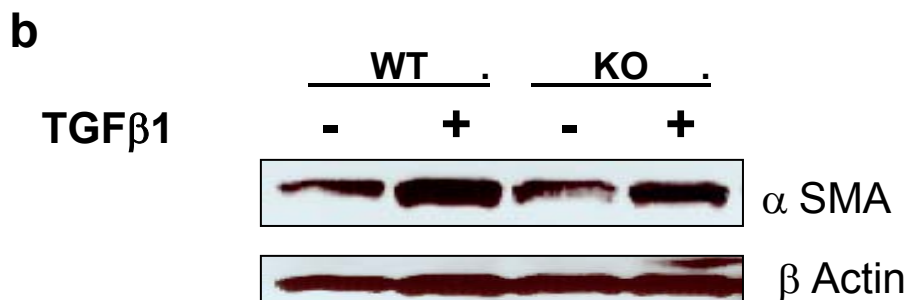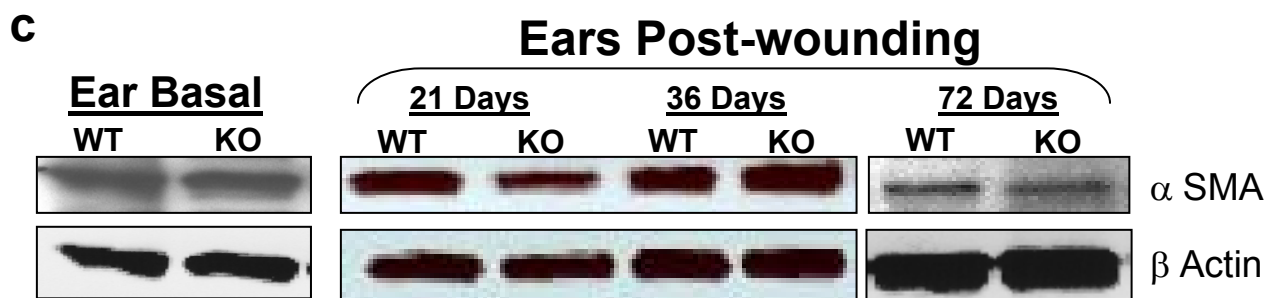

Supplement: pnas_0602473103_6.pdf [file pnas_0602473103_6.pdf]
